# Supplementary material for: Population Pharmacokinetics of Cladribine in Patients with Multiple Sclerosis
Source: PubMed Central journal article supplement — Clin Pharmacokinet. 2017 Mar 2;56(10):1245–53. doi: 10.1007/s40262-017-0516-6 (PMC5591805; doi:10.1007/s40262-017-0516-6), 2017-03-02
Supplement: 40262_2017_516_MOESM1_ESM.pdf [file 40262_2017_516_MOESM1_ESM.pdf]

## **Population Pharmacokinetics of Cladribine in Patients with Multiple Sclerosis**

*Clinical Pharmacokinetics*

Radojka M. Savic,<sup>1</sup> Ana M. Novakovic,<sup>2</sup> Marianne Ekblom,<sup>3</sup> Alain Munafo,<sup>4</sup> Mats O. Karlsson<sup>2</sup>

### **Correspondence:**

Mats O Karlsson  
Department of Pharmaceutical Biosciences  
Uppsala University  
Box 591, 751 24, Uppsala, Sweden  
Email: mats.karlsson@farmbio.uu.se

**Supplemental Table 1**

Dose of cladribine tablets per year and week by patient body weight in the CLARITY study

| Range of body weight, kg | Dose in mg (number of 10 mg tablets) per week |                                 |
|--------------------------|-----------------------------------------------|---------------------------------|
|                          | Treatment week 1 (first month)                | Treatment week 2 (second month) |
| 40 to <50                | 40 mg (4 tablets)                             | 40 mg (4 tablets)               |
| 50 to <60                | 50 mg (5 tablets)                             | 50 mg (5 tablets)               |
| 60 to <70                | 60 mg (6 tablets)                             | 60 mg (6 tablets)               |
| 70 to <80                | 70 mg (7 tablets)                             | 70 mg (7 tablets)               |
| 80 to <90                | 80 mg (8 tablets)                             | 70 mg (7 tablets)               |
| 90 to <100               | 90 mg (9 tablets)                             | 80 mg (8 tablets)               |
| 100 to <110              | 100 mg (10 tablets)                           | 90 mg (9 tablets)               |
| 110 and above            | 100 mg (10 tablets)                           | 100 mg (10 tablets)             |
