# Supplementary material for: Population Pharmacokinetics of Cladribine in Patients with Multiple Sclerosis
Source: PubMed Central journal article supplement — Clin Pharmacokinet. 2017 Mar 2;56(10):1245–53. doi: 10.1007/s40262-017-0516-6 (PMC5591805; doi:10.1007/s40262-017-0516-6), 2017-03-02
Supplement: 40262_2017_516_MOESM2_ESM.pdf [file 40262_2017_516_MOESM2_ESM.pdf]

## **Population Pharmacokinetics of Cladribine in Patients with Multiple Sclerosis**

*Clinical Pharmacokinetics*

Radojka M. Savic,<sup>1</sup> Ana M. Novakovic,<sup>2</sup> Marianne Ekblom,<sup>3</sup> Alain Munafo,<sup>4</sup> Mats O. Karlsson<sup>2</sup>

### **Correspondence:**

Mats O Karlsson  
Department of Pharmaceutical Biosciences  
Uppsala University  
Box 591, 751 24, Uppsala, Sweden  
Email: mats.karlsson@farmbio.uu.se

**Supplemental Table 2**

Cladribine tablets 10 mg tablets per week day in the CLARITY study

| Total tablets per week | Day 1 | Day 2 | Day 3 | Day 4 | Day 5 |
|------------------------|-------|-------|-------|-------|-------|
| 4                      | 1     | 1     | 1     | 1     | 0     |
| 5                      | 1     | 1     | 1     | 1     | 1     |
| 6                      | 2     | 1     | 1     | 1     | 1     |
| 7                      | 2     | 2     | 1     | 1     | 1     |
| 8                      | 2     | 2     | 2     | 1     | 1     |
| 9                      | 2     | 2     | 2     | 2     | 1     |
| 10                     | 2     | 2     | 2     | 2     | 2     |
